# Supplementary material for: Combining Dextran Conjugates with Stimuli-Responsive and Folate-Targeting Activity: A New Class of Multifunctional Nanoparticles for Cancer Therapy
Source: MDPI journal article supplement (doi:10.3390/nano11051108), 2021-04-25
Supplement: s1 [file s1]

## Supplementary Materials

# Combining Dextran conjugates with stimuli-responsive and folate-targeting activity: a new class of multifunctional nanoparticles for cancer therapy

Manuela Curcio<sup>1</sup>, Alessandro Paoli<sup>1</sup>, Giuseppe Cirillo<sup>1</sup>, Sebastiano Di Pietro<sup>2</sup>, Francesca Giordano<sup>1</sup>, Loredana Mauro<sup>1</sup>, Valeria Di Bussolo<sup>2</sup>, Fiore Pasquale Nicoletta<sup>1\*</sup>, Francesca Iemma<sup>1</sup>

<sup>1</sup> Department of Pharmacy, Health and Nutritional Sciences, University of Calabria, 87036 Rende, Italy;

<sup>2</sup> Department of Pharmacy, University of Pisa, Via Bonanno Pisano 6, Pisa, 56126, Italy.

\* Correspondence: [fiore.nicoletta@unical.it](mailto:fiore.nicoletta@unical.it); Tel.: 0039 0984 493194

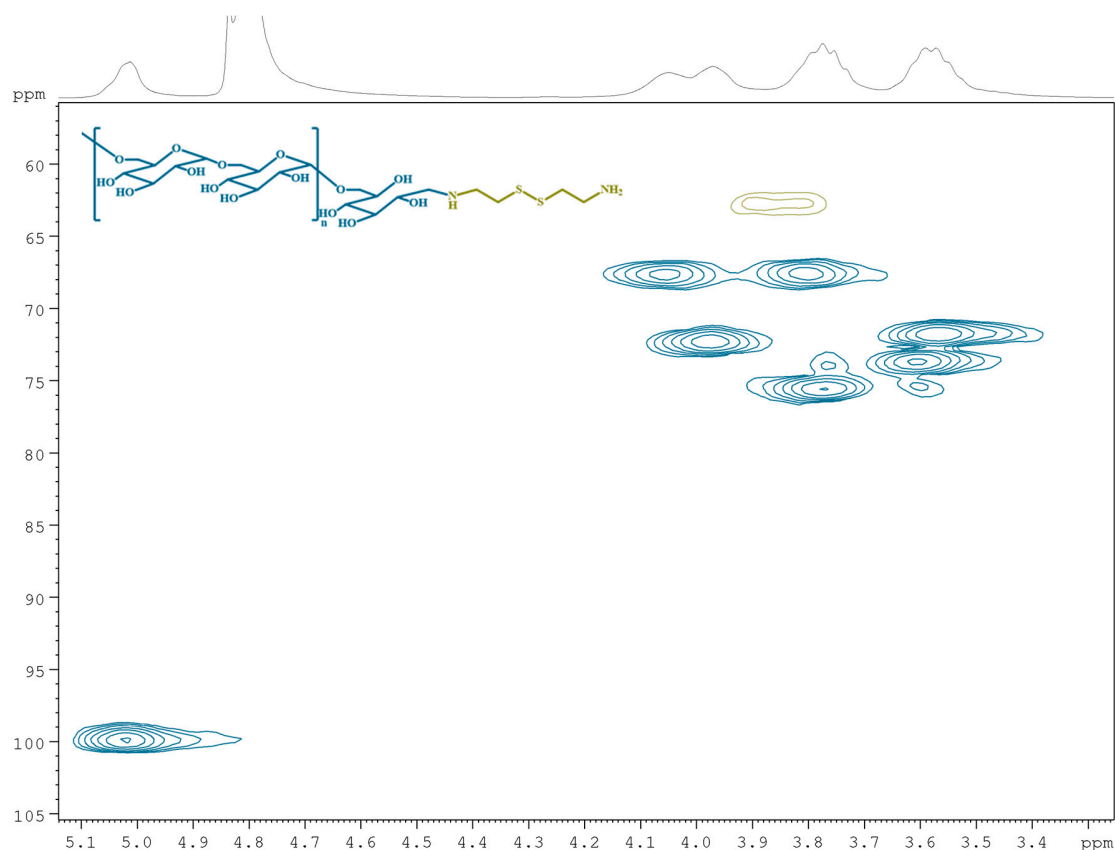

**Figure S1.** 2D-HSQC spectrum of DEXcys.

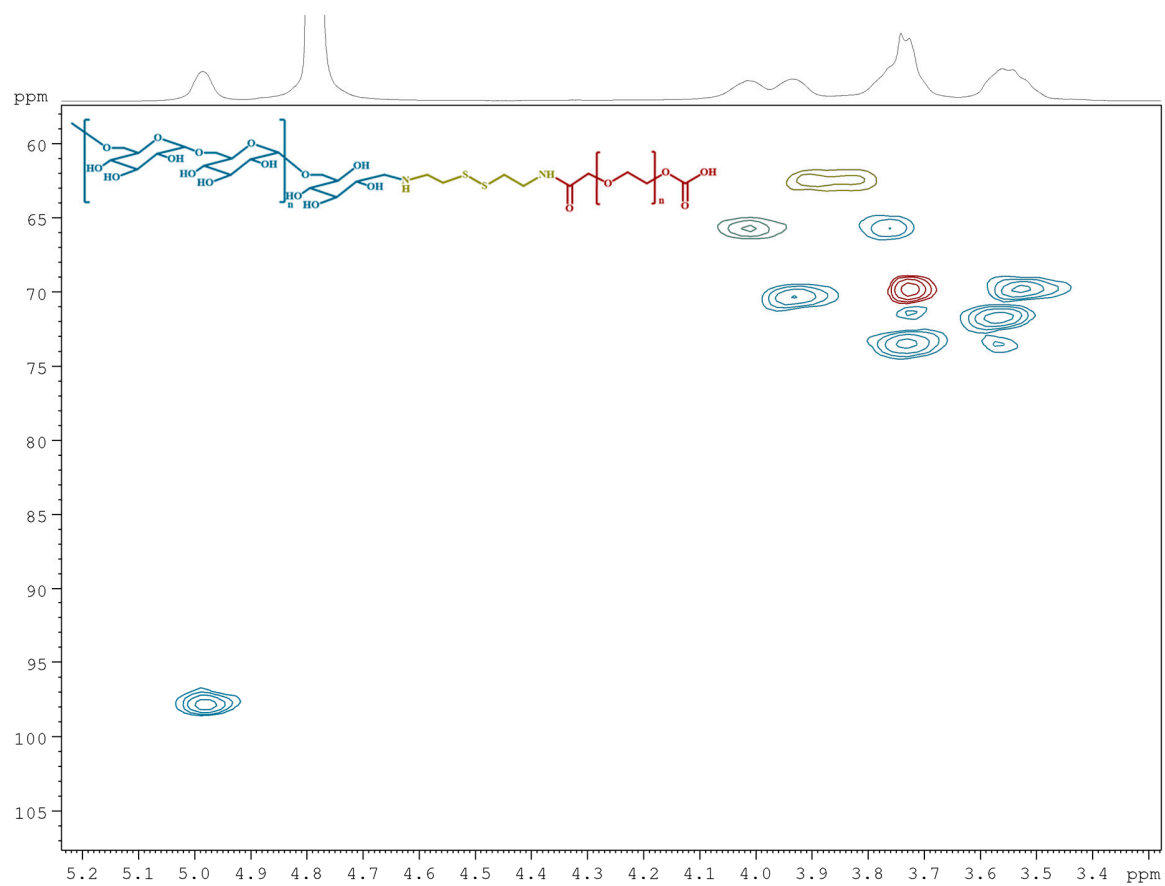

**Figure S2.** 2D-HSQC spectrum of DEXssPEGCOOH.

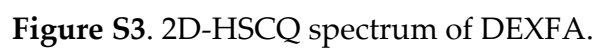

**Figure S3.** 2D-HSCQ spectrum of DEXFA.

## **<sup>1</sup>H-DOSY analyses**

<sup>1</sup>H-DOSY spectra were recorded on a Bruker Avance III 400 MHz at 298 K. Briefly, 0.7 mg samples were dissolved in 0.6 ml of a D<sub>2</sub>O:DMSO-d<sub>6</sub> (2:1 v/v) mixture. The DOSY pulse sequence adopted is the ledbp2s, LED-bipolar gradients pulse sequence. The decay curves were obtained through 16 step magnetic field gradient pulse acquisition in a range from 1 to 52 G/cm. All the parameters for the three experiments were kept identical: 60 scans,  $\delta = 2$  ms,  $\Delta = 285$  ms and  $g = 26752$  rad/(s\*Gauss). The results were elaborated with Dynamic Center, a routine of Bruker's TopSpin software. The Stejskal-Tanner analytic function, which approximates the dependence of the spin echo signal amplitude on the parameters of a magnetic field gradient pulse, was used

$$I(\delta, \Delta) = I_0 \exp[-D\gamma^2 g^2 \delta^2 (\Delta - \delta/3)]$$

where  $I$  and  $I_0$  are the spin echo signal amplitudes in the presence and in the absence of a magnetic field gradient pulse, respectively;  $\Delta$  is the diffusion time, ms;  $\delta$  is the duration of a gradient pulse, ms;  $\gamma$  is the gyromagnetic ratio of the given nucleus, Hz/T; and  $g$  is the magnetic field gradient, T/m.

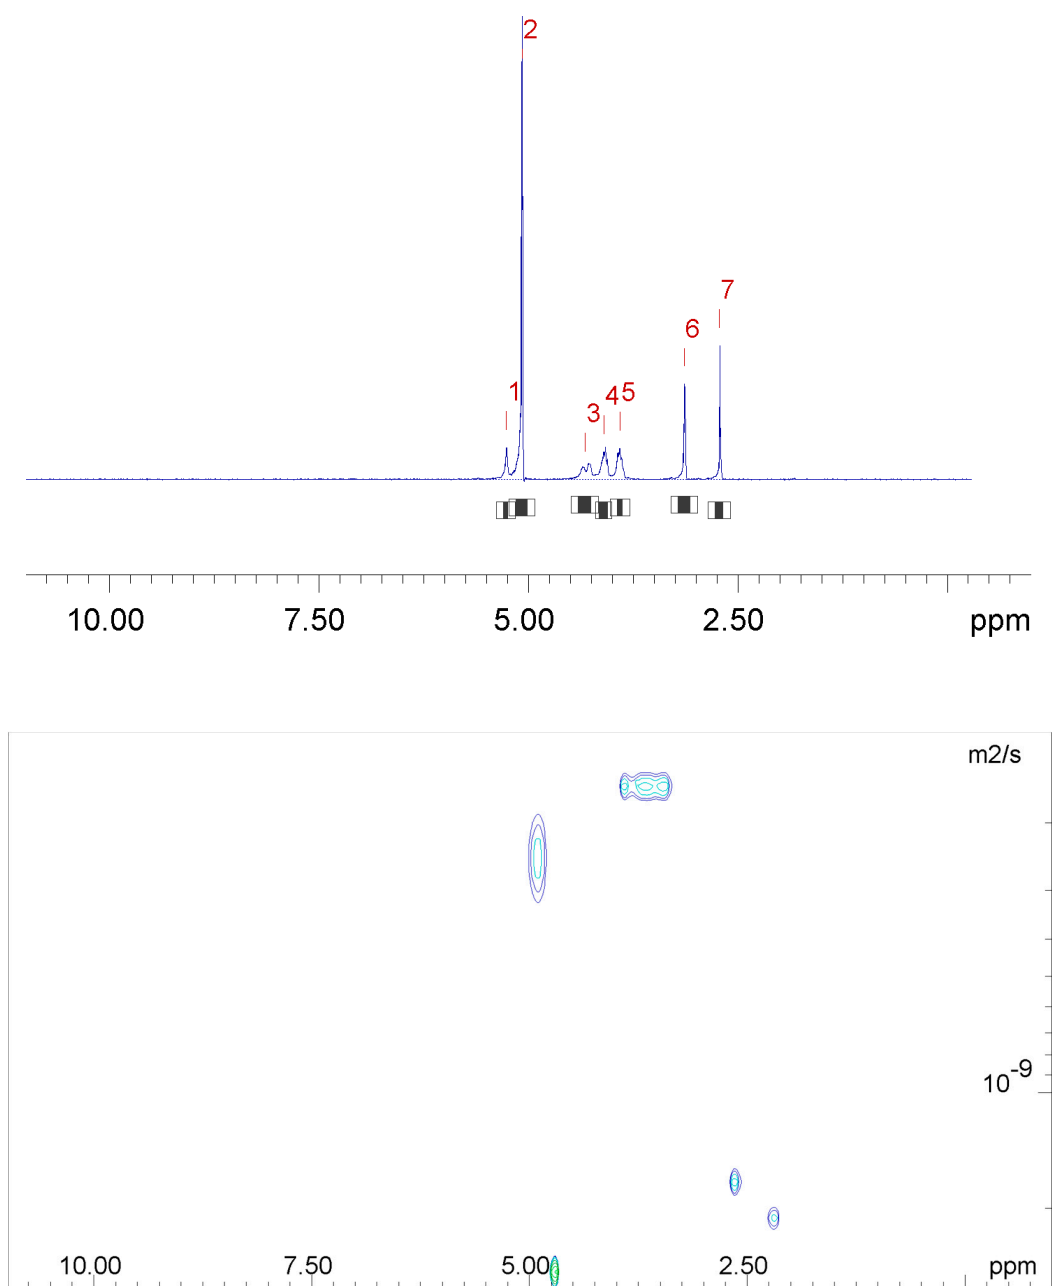

**Figure S4.** DOSY spectrum of DEX with fitting details.

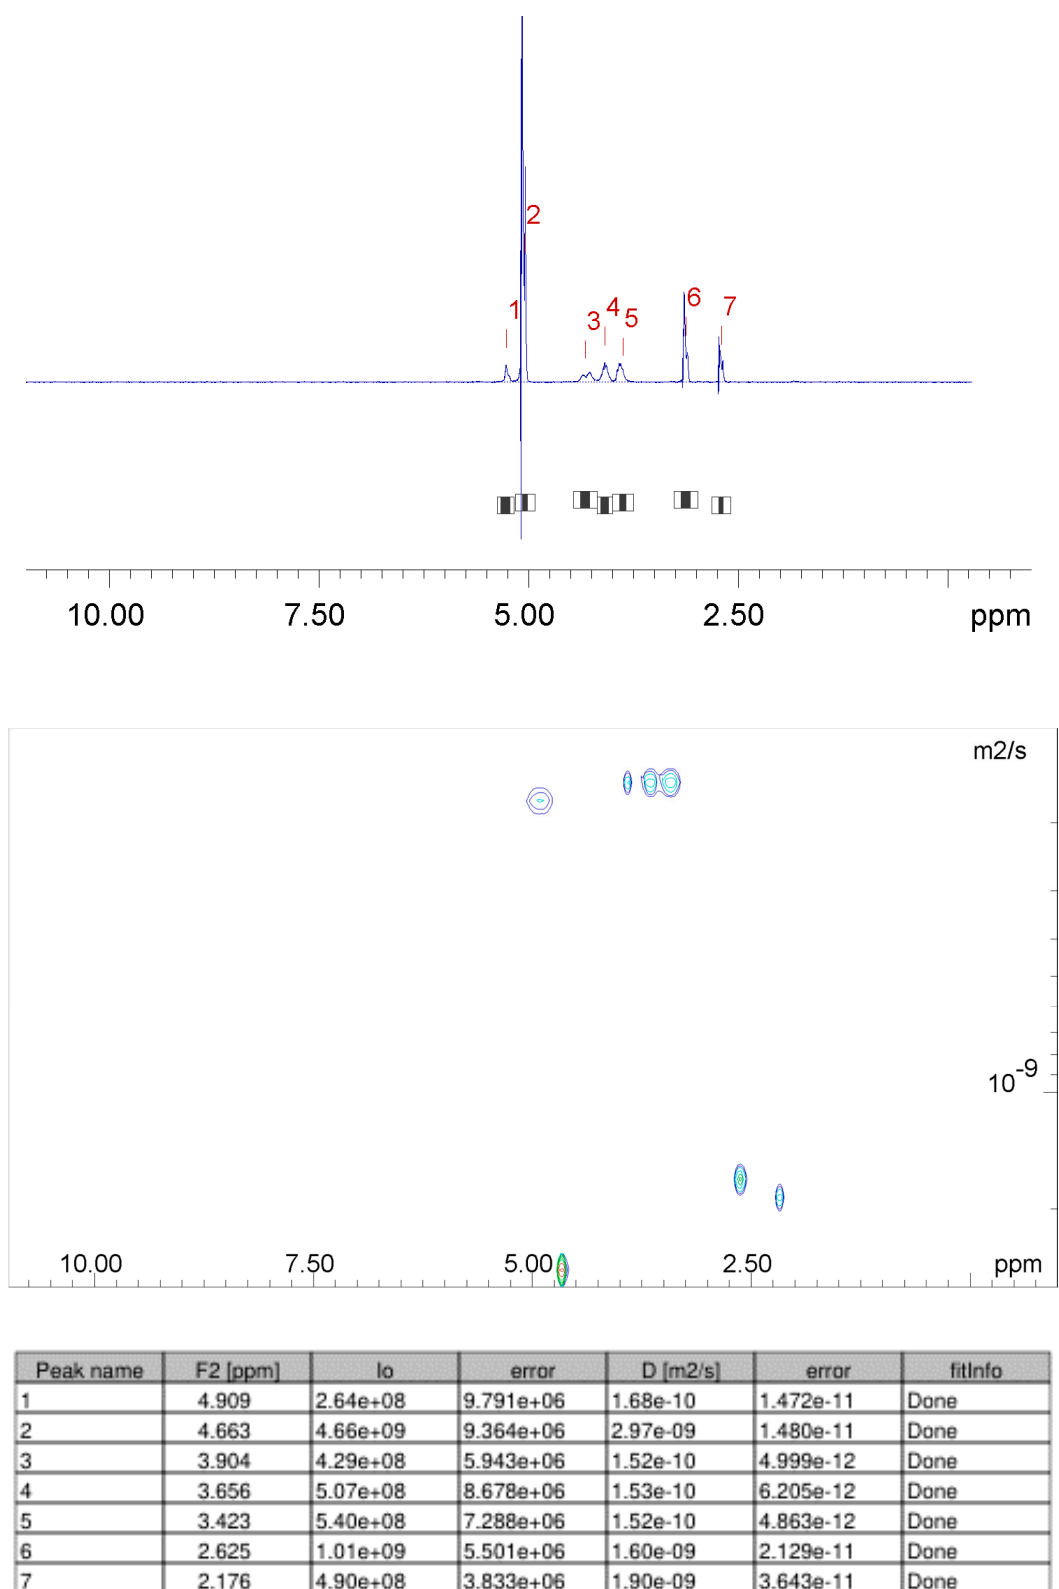

**Figure S5.** DOSY spectrum of DEXcys with fitting details.

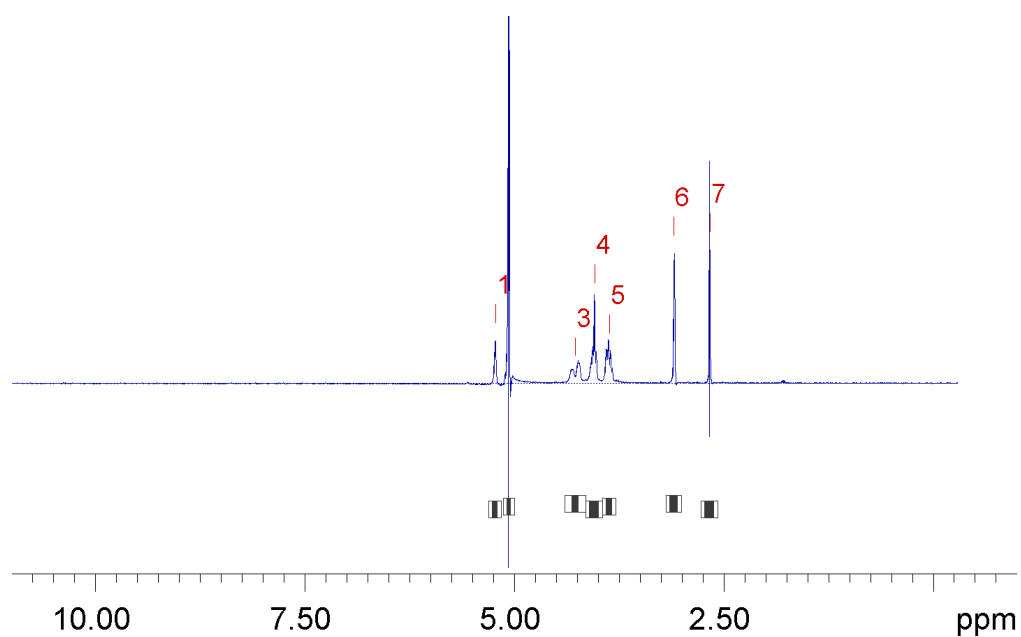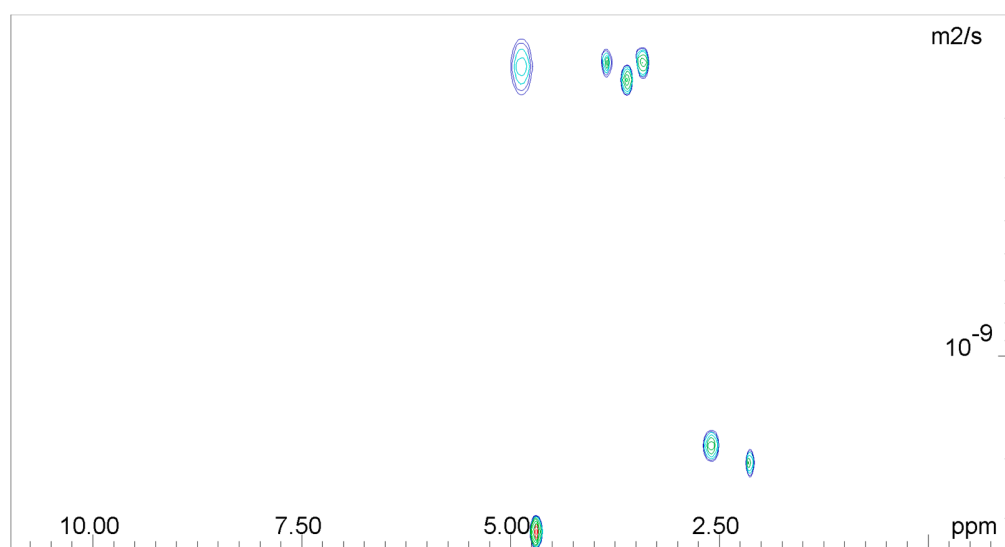

| Peak name | F2 [ppm] | lo       | error     | D [m2/s] | error     | fitInfo |
|-----------|----------|----------|-----------|----------|-----------|---------|
| 1         | 4.864    | 1.54e+08 | 8.736e+06 | 1.34e-10 | 1.812e-11 | Done    |
| 2         | 4.690    | 2.44e+09 | 7.150e+06 | 3.44e-09 | 2.517e-11 | Done    |
| 3         | 3.849    | 3.03e+08 | 3.710e+06 | 1.32e-10 | 4.620e-12 | Done    |
| 4         | 3.605    | 4.41e+08 | 7.907e+06 | 1.45e-10 | 7.560e-12 | Done    |
| 5         | 3.421    | 3.73e+08 | 2.667e+06 | 1.33e-10 | 2.627e-12 | Done    |
| 6         | 2.601    | 3.32e+08 | 2.741e+06 | 1.77e-09 | 3.576e-11 | Done    |
| 7         | 2.146    | 2.69e+08 | 1.805e+06 | 2.06e-09 | 3.383e-11 | Done    |

**Figure S6.** DOSY spectrum of DEXssPEGCOOH with fitting details.
